# Supplementary material for: Adipocyte Precursor-Derived NRG1 Promotes Resistance to FGFR Inhibition in Urothelial Carcinoma
Source: PubMed Central journal article supplement — Cancer Res. 2024 Jan 4;84(5):725–40. doi: 10.1158/0008-5472.CAN-23-1398 (PMC10911805; doi:10.1158/0008-5472.can-23-1398), 2024-01-04
Supplement: can-23-1398_supplementary_figure1_suppsf1.pdf [file can-23-1398_supplementary_figure1_suppsf1.pdf]

# Supplementary Figure S1.

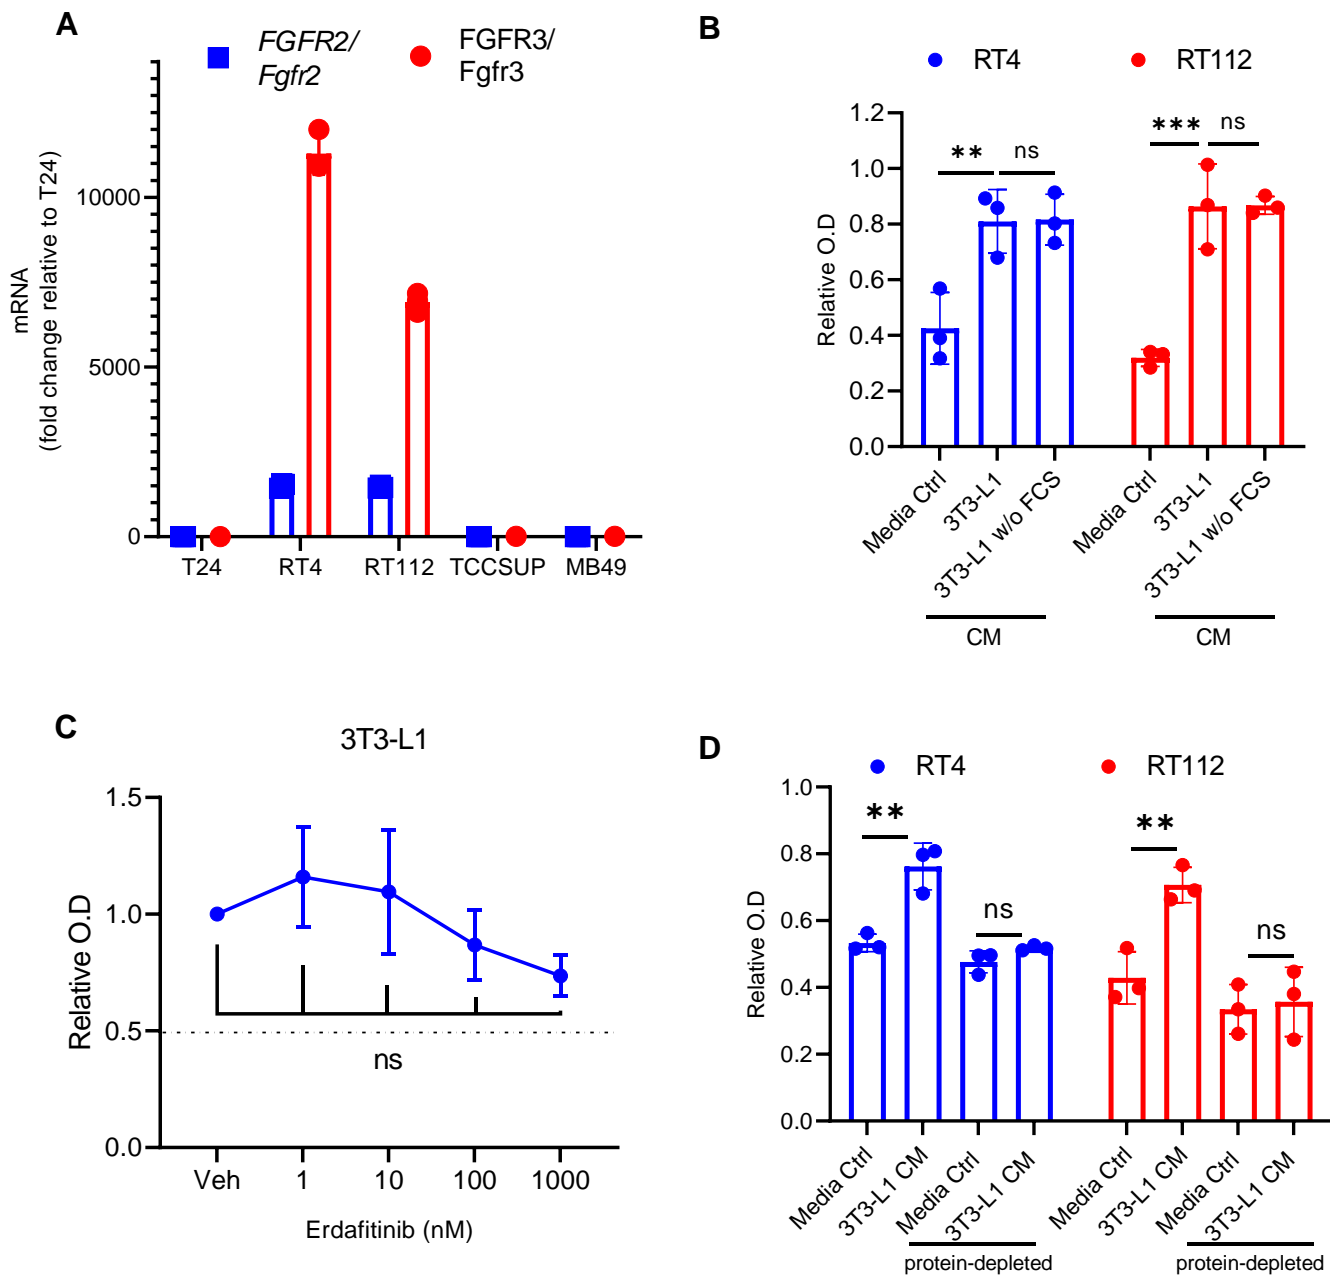

**Supplementary Figure S1: Adipocyte precursors promote resistance against erdafitinib in bladder cancer cell lines.** (A) qRT-PCR analysis of *FGFR2/Fgfr2* and *FGFR3/Fgfr3* in T24, TCCSUP, RT4, RT112, and MB49 cells. Expression levels are normalized to *GAPDH*. Data are represented as mean  $\pm$  SD. (B) Proliferation analysis of RT4 and RT112 cells treated with 10 nM erdafitinib in media control (ctrl) or conditioned media (CM) of 3T3-L1 cells with or without (w/o) serum. Crystal violet staining was performed on day 7. Data are normalized to cells treated with vehicle. "O.D": optical density. Data are represented as mean  $\pm$  SD. Two-way ANOVA was used for statistical analysis. \*\*\* $p < 0.001$ , \*\* $p < 0.01$ , ns: not significant. (C) Proliferation analysis of 3T3-L1 cells treated with vehicle or erdafitinib (1, 10, 100, 1000 nM). Crystal violet staining was done on day 3. "O.D": optical density. Three biological replicates were performed. Data are represented as mean  $\pm$  SD. One-way ANOVA was used for statistical analysis. ns., not significant. (D) Proliferation analysis of RT4 and RT112 cells treated with 10 nM erdafitinib in media ctrl or CM of 3T3-L1 cells or their flowthrough (protein-depleted fractions). Crystal violet staining was performed on day 7. Data are normalized to cells treated with vehicle. "O.D": optical density. Data are represented as mean  $\pm$  SD. Two-way ANOVA was used for statistical analysis. \*\* $p < 0.01$ , ns: not significant.
