# Supplementary material for: Adipocyte Precursor-Derived NRG1 Promotes Resistance to FGFR Inhibition in Urothelial Carcinoma
Source: PubMed Central journal article supplement — Cancer Res. 2024 Jan 4;84(5):725–40. doi: 10.1158/0008-5472.CAN-23-1398 (PMC10911805; doi:10.1158/0008-5472.can-23-1398), 2024-01-04
Supplement: can-23-1398_supplementary_figure3_suppsf3.pdf [file can-23-1398_supplementary_figure3_suppsf3.pdf]

### Supplementary Figure S3.

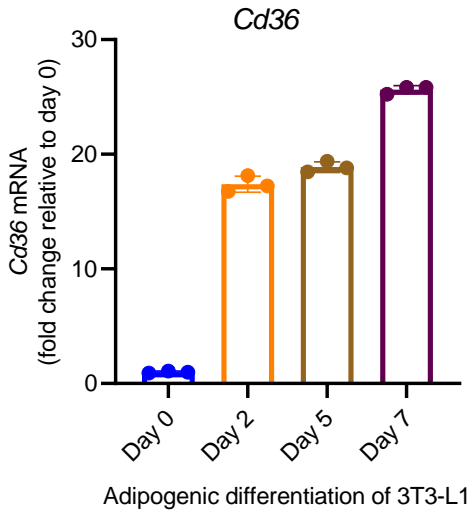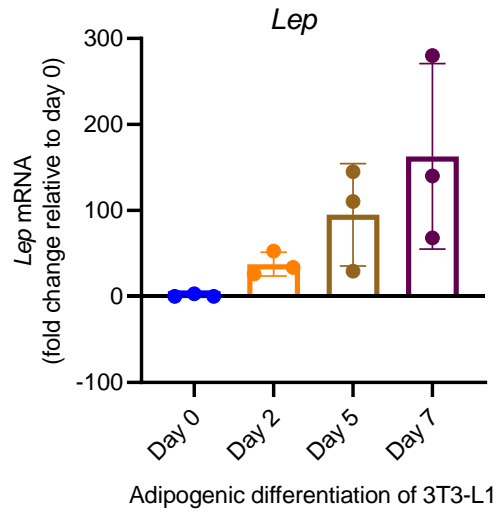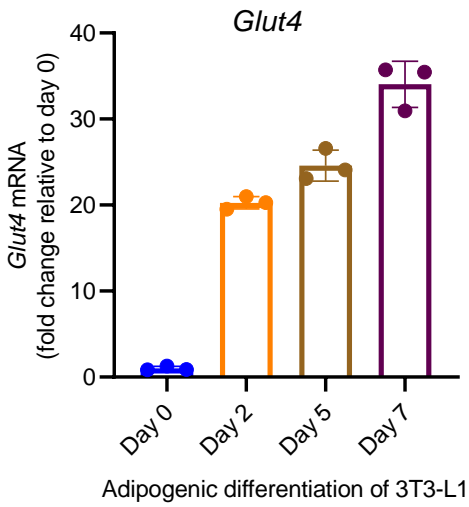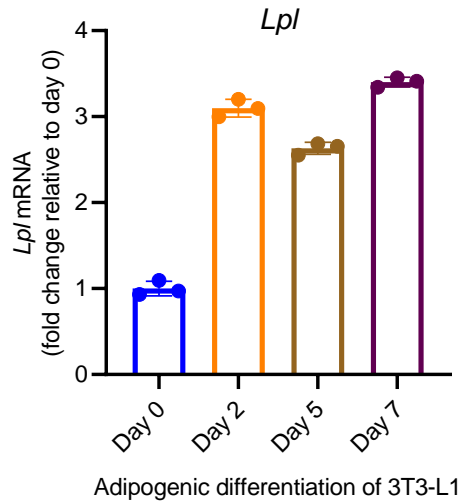

**Supplementary Figure S3: NRG1-mediated resistance against erdafitinib is restricted to pre-adipocytes.** qRT-PCR analysis of *Cd36*, *Lep*, *Glut4*, and *Lpl* in 3T3-L1-derived adipocytes at days 0, 2, 5, and 7 of differentiation. Expression levels are normalized to *GAPDH*. Data are represented as mean  $\pm$  SD.
