# Supplementary material for: Adipocyte Precursor-Derived NRG1 Promotes Resistance to FGFR Inhibition in Urothelial Carcinoma
Source: PubMed Central journal article supplement — Cancer Res. 2024 Jan 4;84(5):725–40. doi: 10.1158/0008-5472.CAN-23-1398 (PMC10911805; doi:10.1158/0008-5472.can-23-1398), 2024-01-04
Supplement: can-23-1398_supplementary_figure5_suppsf5.pdf [file can-23-1398_supplementary_figure5_suppsf5.pdf]

## Supplementary Figure S5.

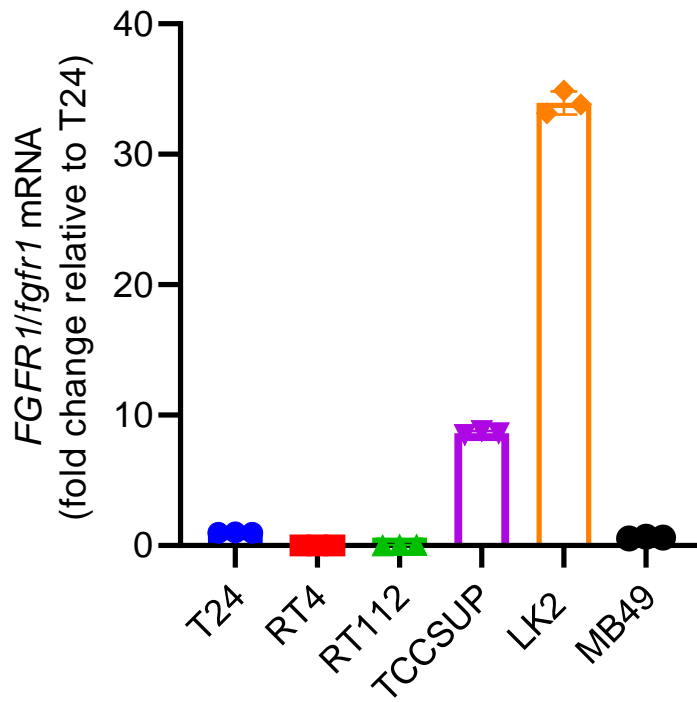

**Supplementary Figure S5: NRG1-mediates resistance against erdafitinib in FGFR1-dependent lung carcinoma.** qRT-PCR analysis of *FGFR1/Fgfr1* and in T24, TCCSUP, RT4, RT112, LK2, and MB49 cells. Expression levels are normalized to *GAPDH*
